# Supplementary material for: Protein Dynamics in F-like Bacterial Conjugation
Source: PubMed Central journal article supplement (PMC7555446; doi:10.3390/biomedicines8090362), 2020-09-19
Supplement: biomedicines-08-00362-s001.pdf [file biomedicines-08-00362-s001.pdf]

## **Supplementary Information**

### **Protein Dynamics in F-like Bacterial Conjugation**

Nicholas Bragagnolo, Christina Rodriguez, Naveed Samari-Kermani, Alice Fours, Mahboubeh Korouzhdehi, Rachel Lysenko  
and Gerald F. Audette<sup>†</sup>

Department of Chemistry & Centre for Research on Biomolecular Interactions

York University, 4700 Keele St., Toronto, ON M3J 1P3 Canada

**Supplementary Table 1: Details Regarding Predicted Disordered Regions of Transfer Proteins from the F Plasmid\***

| Protein | Size (aa) | Disorder (%) | GenBank  | UniProtKB | AA Sequence                                                                                                                                                                                                                                                                                                                                                                                                                                                                                                                    |
|---------|-----------|--------------|----------|-----------|--------------------------------------------------------------------------------------------------------------------------------------------------------------------------------------------------------------------------------------------------------------------------------------------------------------------------------------------------------------------------------------------------------------------------------------------------------------------------------------------------------------------------------|
| FinO    | 186       | 42%          | M38047   | P22707    | MTEQKRPVLTLLKRRKTEGETLVRSRKTIIINVTPPKWKVKKQKLAEKAAREAEAAKKAQARQALS<br>IYLNLP TLDDAVNTLKPWWPGLFDGDTPRLLACGIRDV LLEDVAQRNIP LSHKKLRRALKAITRSES<br>YLCAMKAGACRYDTEGYVTEHISQEEEEAYAAERLDKIRRQNRRIKAE LQAVLDEK                                                                                                                                                                                                                                                                                                                      |
| TraJ    | 229       | 21%          | BAA97942 | P06626    | MYPMDRIQQKHARQIDLLENLTA VIQDY PNPACIRD ETGKFIFCN TLFHESFL TQDQSAEKWLLSQR<br>DFCELISVTEMEA YRNEHTHLNL VEDVFIQNRFWTISVQSFLNGHRN IILWQFYDAAHV RHKDSYN<br>QKTIVSDDIRNI IRRMSDDSSVSSYVNDVFYL YSTGISHNAIARIL NISISTSKKHASLICDYFSVSNKD<br>ELIILLYNKKFIYYLYEKAMCIINTR                                                                                                                                                                                                                                                                  |
| TraA    | 70        | 20%          | BAA97944 | P04737    | AGSSGQDLMASGNTTVKATFGKDSSVVKWVVLAEVLVGAVMYMMTKNVKFLAGFAIISVFI AVG<br>MAVVGL                                                                                                                                                                                                                                                                                                                                                                                                                                                    |
| TraR    | 73        | 19%          | BAA97953 | P41065    | MSDEADEAYSVTEQLTMTGINRIRQKINAHGIPVYLCEACGNPIPEARRKIFPGVTLCVECQAYQER<br>QRKHYA                                                                                                                                                                                                                                                                                                                                                                                                                                                  |
| TraQ    | 94        | 22%          | BAA97964 | P18033    | MISKRRFSLPRLDITGMWVFSLGVWFHIVARLVYSKPWMAFFLAELIAAILV LFGAYQVLD AWIAR<br>VSREEREAL EARQQAMMEGQQEGGHVSH                                                                                                                                                                                                                                                                                                                                                                                                                          |
| TraX    | 248       | 13%          | BAA97975 | P22709    | MTTDNTNTRND SLVARTDTWLQSLLVWSPGQRDIKTVALVLMVLDHANRILHLDQSWMFLAG<br>RGAFPLFALVWGLNLSRHAHIRQLAINRLWGWA VFSQFWYFAGFPWYEGNILFAFAVAAQVLT<br>WCETRSGWR TAAA ILMMALWG PLSGTSYGIAGLLMLA VSHRLYRAEDR MERLVLVACLLA VIPA<br>LNLATSDAAA VAGLVMTVLT VGLVSCAGKLLSRFPWPGDFPFTFYACHLAVLGV LAL                                                                                                                                                                                                                                                  |
| TraB    | 475       | 44%          | BAA97948 | P41067    | MASINTIVKRKQYLWLGIVVVG TASAIGGALYLSDVDMSGNGETVAEQEPVDMTG VVDTTFDDK<br>VRQHATTEMQV TAAQMOKQYEEIRRELDV LNKQRGDDQRRIEKLGDNAALAEQVKALGANPV<br>TATGEPVPQMPASPPGPEGEPQPGNTPVSFPPQGSVAVPPPTAFYPGNGVTPPPQV TYQSVV PNRIQ<br>RKVFTRNEGKQGPSLPYIPSGSFAKAMLIEGADANASVTGNESTVPMQLRITGLVEMPNSKTYDAT<br>GCFVGLEAWGDVSSERAIVRTRNISCLKDGKTIDMPIKGHVSRFGKNGIKGEVVMRNGKILGWAW<br>GAGFVDGIGQG MERASQPAVGLGATAAYGAGDVLKMGIGGGASKAAQTLSDY YIKRAEQYHPVI<br>PIGAGNEVT VVFQDGFQLKTVEEMALERTQSRAEEDNPESPVPVPPSAESHLNGFN TDQMLKQLGN<br>LNPQQFMSGSQGGGNDGK |
| TraK    | 242       | 34%          | BAA97947 | P41066    | MRKNNTAIIFGSLFFSCSVMAANGTLAPT VVPMVNGGQASIAISNTSPNLFTVPGDR IIAVNSLDGAL<br>TNNEQTASGGVVVATV NKKPFTFILETERGLNLSIQAVPREGAGRTIQLVSDLRGTGEEAGAWETS<br>TPYESLLVTISQAVRGGKLPAGWYQVPVTKETLQAPAGLSSVADAVWTGNHLK MVRFAVENKTL<br>SALNIRESDFWQPGTRAVMFSQPASQLLAGARMDVYVIR DGEGN                                                                                                                                                                                                                                                            |
| TraV    | 171       | 61%          | BAA97952 | P41069    | MKQTSFFIPLLGTLLLYGCAGTSTEFECNATTS DTCMTMEQANEKAKK LERSSEAKPVAASL PRLA<br>EGNFRTMPVQTVTATTPSGSRPAVTAHPEQKLLAPRPLFTAAREVKTVVPVSSVTPVTPPRPLRTGE<br>QTAALWIAPYIDNQDVYHQPSVFFVIKPSAWGKPRIN                                                                                                                                                                                                                                                                                                                                          |

|      |     |     |                     |        |                                                                                                                                                                                                                                                                                                                                                                                                                                                                                                                                                                                                                                                                                                                                                                                                                                                                                                                |
|------|-----|-----|---------------------|--------|----------------------------------------------------------------------------------------------------------------------------------------------------------------------------------------------------------------------------------------------------------------------------------------------------------------------------------------------------------------------------------------------------------------------------------------------------------------------------------------------------------------------------------------------------------------------------------------------------------------------------------------------------------------------------------------------------------------------------------------------------------------------------------------------------------------------------------------------------------------------------------------------------------------|
| TraF | 247 | 17% | BAA97961            | P14497 | MNKALLPLLLCCFIFPASGKDAGWQWYNEKINPKEKENKPVPAAPRQEPDIMQKLAALQTATKRALYEAILYPGVDNFVKYFRLQNYWAQQAGLFTMSARKAMLAHPELDYNLQYSHYNGTVRNQLAADQAQQRQAIAKLAEHYGIMFFYRGQDPIDGQLAQVINGFRDITYGLSVIPVSDGVINPLLPDSRTDQGGQAQRLGVKYFPAMMLVDPKQGSVRPLSYGFISQDDLAKQFLNVSEDFKPNF                                                                                                                                                                                                                                                                                                                                                                                                                                                                                                                                                                                                                                                       |
| TrbB | 181 | 31% | BAA97965            | P18035 | MSLTKSLLFTLLSAAA VQASTRDEIERLWNPQGMATQPAQPAAGTSARTAKPAPRWFRSLNGRQVNLADWKVVLFMQGHCPYCHQFDPVLKQLAQYGFVSFYSYTLDGQGDATFPEALPVPDVMQTFPNIPTVATPTTFLVNVNTLEALPLLQGATDAAGFMARVDTVLQMYGGKKGAK                                                                                                                                                                                                                                                                                                                                                                                                                                                                                                                                                                                                                                                                                                                           |
| TraC | 875 | 15% | BAA97954            | P18004 | MNNPLEAVTQAVNSLV TALKLPDESAKANEVLGEMSFQFSRLLPYRDYNQESGLFMNDTTMGFMLEAIPINGANESIVEALDHMLR TKLPRGIPLCIHLMSSQLVGDRIEYGLREFSWSGEQAERFNAITRAYYMKAAATQFPLPEGMNLPLTLRH YRVFISYCSPSKKKSRADILEMENLVKIIRASLQGASITQT VDAQAFIDIVGEMINHPDSL YPKRRQLDPYSDLNYQCVEDSFDLKV RADYLTGLRENGRNSTARILNFHLARNPEIAFLWNMADNYSNLLNPELSISCPFILTLTLVVEDQVKTHSEANLKYMDLEKKS KTSYAKWFPSVEKEAKEW GELRQLR LGSQSSVVS YFLNITAFCKDNNETALEVEQDILNSFRKNGFELISPRFNHMRNFLTCLPFMAGKGLFKQLKEAGVVQRAESFNVANLMPLVADNPLTPAGLLAPTYRNQLAFIDIFFRGMNNTNYNMAVCGTSGAGKTGLIQPLIRSVLDSGGFAVVFDMDGDYKSLCENMGGVYLDGETLRFNPFANITDIDQSAERVRDQLSVMASPNGNLDEVHEGLLQAVRASWLAKENRARIDDVVDLKNASDSEQYAESPTIRSR LDEMIVLLDQY TANGTYGQYFNSDEPSLRDDAKMVVLELGGLED RPSLLVAVMFSLIYIENRMYRTPRNLKKNVIDEGWRLDFKNHKVGEFIEKGYRTARRHTGAYITITQNI VDFDSDKASSAARAAWGNSSYKIILKQSAKEFAKYNQLYPDQFLPQRDMIGKFGAAKDQWFSSFLQVENHSSWHRLFVDPLSRAMYSSDGPDFEFVQQKRKEGLSHEAVWQLA WKKSGPEMASLEAWLEEHEKYRSVA |
| TraW | 210 | 16% | BAA97956<br>(cont.) | P18472 | MRCRGLIALLIWGQSVAAADLGTWGDLPVKEPDMMLTVIMQRLTALEQSGEMGRKMDAFKERVIRNSLRPPAVPGIGRTEKYGSR LFDPSVRLAADIRDNEGRV FARQGEVMNPLQYVFPNQTL YFINGDDPAQVAWMKRQTPPTLESKIILVQGSIPEMQKSLDSRVYFDQNGVLCQRLGIDQV PARVSAVPGDRFLKVEFIPAEGRK                                                                                                                                                                                                                                                                                                                                                                                                                                                                                                                                                                                                                                                                                          |
| TrbC | 212 | 29% | BAA97958            | P18473 | MKLSMKSLAALLMMLNGAVMASENVNTPENRQFLKQQENLSRQLREKPDHQLKAWAEKQVLENPLQRS DNHF LDELVRKQQASQDGKPRQGALYFVSFSIPEEGLKRMLGETRHF GIPATLRGMVNNDLKTAEAVLSLVKDGATDGVQIDPTLFSQYGIRTVPALVVFCSQGYDIIRGNLRV GQALEKVAATGDCRQVAHDLLAGKGD SGK                                                                                                                                                                                                                                                                                                                                                                                                                                                                                                                                                                                                                                                                                       |
| TraP | 196 | 24% | BAA97949            | P41068 | MANNMSSRQACHAARYVVARVLRGLFWCLKYTVILPLATMALMALFVLWKDNTTPGKLLVKEINFVRQTAPAGQFPVSECFWSSSDSSGRSEIQGICHYRAADAADYVRETDRSLMQLVTALWATLALMYVSLAAITGKYVPRPGMKCIRVVTADEHLKEVYTEDASLPGKIRKCPVYLPDDR TNRNNGDKN EHA                                                                                                                                                                                                                                                                                                                                                                                                                                                                                                                                                                                                                                                                                                          |
| TraE | 188 | 11% | BAA97946            | P08322 | MEHGARLSTSRVMAIAFIMSVLIVLSLSVNVIQGVNNYRLQNEQRTAVTPMAFNAPFAV SQNSADASYLQQMALSFIALRLNVSSETVDASHQALLQYIRPGAQNQMKVILAEAEAKRIKNDNVNSAFFQTSVRVWPQYGRVEIRGV LK TWIGDSKPFTDIKH YILILKRENGVTWLDNFGETDDEKK                                                                                                                                                                                                                                                                                                                                                                                                                                                                                                                                                                                                                                                                                                               |
| TraL | 91  | 13% | BAA97945            | P08321 | MSGDENKLLKYRFPETLTNQSRWFLPLDELIPAAICIGWGITTSKYLFGIGA AVL VYFGIKK LKKG RGSSWLRDLIYWYMP TALLRGIFS                                                                                                                                                                                                                                                                                                                                                                                                                                                                                                                                                                                                                                                                                                                                                                                                                |

|      |     |     |          |        |                                                                                                                                                                                                                                                                                                                                                                                                                                                                                                                                                                                                                                                                                                                                                                                                                                                                                                                                                                                                                                                                          |
|------|-----|-----|----------|--------|--------------------------------------------------------------------------------------------------------------------------------------------------------------------------------------------------------------------------------------------------------------------------------------------------------------------------------------------------------------------------------------------------------------------------------------------------------------------------------------------------------------------------------------------------------------------------------------------------------------------------------------------------------------------------------------------------------------------------------------------------------------------------------------------------------------------------------------------------------------------------------------------------------------------------------------------------------------------------------------------------------------------------------------------------------------------------|
| TraH | 458 | 25% | BAA97968 | P15069 | <p> MMPRIKPLLVLCAALLT VTPAASADVNSDMNQFFNKLGFASNTTQPGVWQGOAAGYAYGGSLYA<br/> RTQVKNVQLISM TLPDINAGCGGIDAYLGSFSFINQEQLQRFVKQIMSNAAGYFFDLALQTTVPEIK<br/> TAKDFLQKMASDINSMNLSSCQAAQGIIGGLFPRTQVSQQKVCQDIAGESNIFADWAASRQGCTVG<br/> GKSDSVRDKASDKDKERVTKNINIMWNALSKNRMFDGNKELKEFVMTLTGSLVFGPNGEITPLSA<br/> RTTDRSIIRAMMEGGTAKISHCNDSDKCLKVVADTPVTISRDNALKSQITKLLASIQNKA VSDTPLD<br/> DKEKGFISSTTIPVFKYL VDPQMLGVSNSMIYQLTDYIGYDILLQYIQELIQQARAMVATGNIDEAV<br/> IGHINDNMNDATRQIAAFQSQVQVQQDALLVVDQRMSYMRQQLSARMLSRYQNNYHFGGSTL </p>                                                                                                                                                                                                                                                                                                                                                                                                                                                                                                                                              |
| TrbI | 128 | 23% | BAA97955 | P18006 | <p> MSSTQKPADVTAERRSHWWVTPVPGCLAMVLLNAAVSYGIVRLNAPVTVAFNMKQTVDAFFDSA<br/> SQKQLSEAQSKALSARFNTALEASLQAWQQKHHAVILVSPA VVQGAPDITREIQQDIARRMRAEP </p>                                                                                                                                                                                                                                                                                                                                                                                                                                                                                                                                                                                                                                                                                                                                                                                                                                                                                                                        |
| TraN | 602 | 25% | BAA97959 | P24082 | <p> MKRILPLILALVAGMAQADSNSDYRAGSDFAHQIKGGQSSSIQGFKPQESIPGYNANPDETKYYGG<br/> VTAGGDGGLKNDGTTEWATGETGKTITESFMNKPKDILSPDAPFIQTGRDVVNRADSIVGNTGQQC<br/> SAQEISRSEYTNYT CERDLQVEQYCTR TARMELQGSTTWETRTLEYEMS QLPAREVNGQYVVSITS<br/> PVTGEIVDAHYSWSR TYLQKSVPMITITVLGTPLSWNAKYSADASFTPVQKTLTAGVAFTSSHPVRV<br/> GNTKFKRHTAMKRLRVVRVKKASYTPYVWVWSESCPFSEKELGKLTKECTEAGGNRTL VKDGQSY<br/> SMYQSCWAYRDTYVTQSADKGTCTYTDNPACTLVSHQCAFYSEEACLHEYATYSCESKTS GK<br/> VMVCGGDVFLDGEDKAQSGKSNDFAEAVSQAALAAAGKDVAALNGVDVRAFTGQAKFKCK<br/> AAAGYSNCCKDSGWGQDIGLAKCSDEKALAKAKSNKLTVSVGEFCSK KVLGVCLEKKRSYCF<br/> DSKLAQIVQQQRNGQLRISFGSAKHPDCRGITVDELQKIQFNRLDFTNFYEDLMNNQKIPDSGVLT<br/> QKVKEQIADQLKQAGQ </p>                                                                                                                                                                                                                                                                                                                                                                               |
| TraG | 938 | 43% | BAA97969 | P33790 | <p> MNEVYVIAGGEWLRNNLNAIAAFMGTWTWDSIEKIALTSLVLA VAVMVVQRHNVMDDL GWVA<br/> VFVLISLLVNRVTSVQIHDNSDLVKVHRVDNVPVGLAMPLSLTTRIGHAMVASYEMIFTQPDSVTYS<br/> KTGMLFGANLIVKSTDFLSRNPEIINLFQDYVQNCVLGDIYLNHKYTLEDLMASADPYTLIFSRPSPL<br/> RGVYDNNNNFITCKDASVTLKDRNLNLDTKTGGKTWHYVYVQQIFGGRPD PDLFRQLVSDSYSYFY<br/> GSSQSASQIMRQNVMTNALKEGITSNAARNGDTASLVSLATTSSMEKQRLAHVSIGHVTMRNLPM<br/> VQILTGIAIGIFPLLILAAVFNKLTLSVLKGYVFALMWLQTWPLLYAILNSAMTFYAKQNGAPVVL<br/> SELSQIQLKYSNLASTAGYLSAMIPPLSWMMVKGLGAGFSSVYSHFASSSISPTASAAGSVVDGNYS<br/> YGNMQTENVNGFSWSTNSTTSFGQMMYQTGSGATATQTRDGNMVMMDASGAMSRLPVGINATRQ<br/> IAAAQQEMAREASNRAESALHGFSSSIA SAWNTLSQFGSNRGSSDSVTGGADSTMSAQDSMMASR<br/> MRSAVESYAKAHNISNEQATRELASRSTNASLGLYGDAYAKGHLGISVLGNGGGVGLQAGAKASI<br/> DGSDLDSHEASSGSRASHDARHDIDARATQDFKEASDYFTSRKVSESGSHTDNNADSRVDQLSAAL<br/> NSAKQSYDQYTTNMTRSHEYAEMASRTESMSGQMSDLSQQFAQYVMKNAPQDVEAILTNTSSP<br/> EIAERRAMAWSFVQEQVQPGVDNTWRESRRDIGKGMESVPSGGGSQDIADHQGHQAIIERTQD<br/> SNIRNDVKHQVDNMVTEYRGNIGDTQNSIRGEENIVKGQYSELQNHKTEAL TQNNKYNEEKLAQ<br/> ERIPGADSPKELLEKAKSYQHKE </p> |
| TraU | 330 | 26% | BAA97957 | P18471 | <p> MKRRLWLLMLFLFAGHVPAAASADSACEGRFVN PITDICWSCIFPLSLGSIKVSQGV PDTANPSMPI<br/> QICPAPPPLFRRI GLAIGYWEPMALTDVTRSPGCMVNLGFSLPAFGKTAQGTAKKDEKQVNGAFYH<br/> VHWYKYPLTYWLNITSLGCL EGGDMEDIAYLSEIDPTWTDSSLTTILNPEAVIFANPIAQGACAADAI<br/> ASAFNMPLDVLFWCAGSQGSMYPFNGWVSNESPLQSSLLVSERMAFKLHRQGMIMETIGKNNAV<br/> CNEYPSILPKERWRYQMVMNMYPDSGQCHPFGRSVTRWETGKNPENTKKNFGYLMWRKRNCVFL </p>                                                                                                                                                                                                                                                                                                                                                                                                                                                                                                                                                                                                                                                                                           |

|      |      |     |          |        |                                                                                                                                                                                                                                                                                                                                                                                                                                                                                                                                                                                                                                                                                                                                                                                                                                                                                                                                                                                                                                                                                                                                                                                                                                                                                                                                                                                                                                                                                                                                                                                                                                                                                                                                                                                                                                                                                                                                                      |
|------|------|-----|----------|--------|------------------------------------------------------------------------------------------------------------------------------------------------------------------------------------------------------------------------------------------------------------------------------------------------------------------------------------------------------------------------------------------------------------------------------------------------------------------------------------------------------------------------------------------------------------------------------------------------------------------------------------------------------------------------------------------------------------------------------------------------------------------------------------------------------------------------------------------------------------------------------------------------------------------------------------------------------------------------------------------------------------------------------------------------------------------------------------------------------------------------------------------------------------------------------------------------------------------------------------------------------------------------------------------------------------------------------------------------------------------------------------------------------------------------------------------------------------------------------------------------------------------------------------------------------------------------------------------------------------------------------------------------------------------------------------------------------------------------------------------------------------------------------------------------------------------------------------------------------------------------------------------------------------------------------------------------------|
| TraI | 1756 | 20% | BAA97974 | P14565 | MMSIAQVRSAGSAGNYITDKDNYVVLGSMGERWAGRGAEQLGLQGSVDKDVFTRLLEGRLPDG<br>ADLSRMQDGSNRHRPGYDLTFSAPKSVSMAMLGDKRLIDAHNQAVIDFAVRQVEALASTRVM<br>TDGQSETVLTGNLVMALFNHDTSRDQEPQLHTHAVVANVTQHNGEWKTLSSDKVGKTGFIENVY<br>ANQIAFGRLYREKLKEQVEALGYETEYVVGKHGMWEMPGVPVEAFSGRSQTIREAVGEDASLKSRD<br>VAALDTRKSKQHVDPEIKMAEWMQTLKETGFDIRAYRDAADQRADLRLTPGPASQDGPDVQQA<br>VTQAIAGLSERKVQFTYTDVLRARTVGILPPENGVIERARAGIDEAISREQLIPLDREKGLFTSGIHVLD<br>ELSVRALS RDIMKQNRVTVHPEKSVPRTAGYSDAVSVLAQDRPSLAIVSGQGGAGQRERVAELV<br>MMAREQGREVQIIAADRRSQMNMKQDERLSGELITGRRQLLEGMAFTPGSTVIVDQGEKLSLKET<br>LTLLDGAARHNVQVLITDSGQRTGTGSALMAMKDAGVNTYRWQGGEQRPATIISEPDRNVRYAR<br>LAGDFAASVKAGEESVAQVSGVREQAILTQAIRSELKTQGVGLLPEVTMTALSPVWLDSSRSRYLRD<br>MYRPGMVMEQWNPETRS HDRYVIDRVTAQSHSLTLRDAQGETQVVRISLSDSSWSLFRPEKMPVA<br>DGERLRVTGKIPGLRVSGGDR LQVASVSEDAMTVVVPGRAEPATLPVSDSPFTALKLENGWVETP<br>GHSVSDSATVFASVTQMAMDNATLNGLARSGRDVRLYSSLDETRTAEKLARHPSFTV VSEQIKTR<br>AGETSLETAISHQKSALHTPAQQAIHLALPVVESKLA FMSVDLLTEAKSFAAEGTGFTLGGEINA<br>QIKRGDLLYVDVAKGYGTGLLVS RASYEAEKSILRHILEGKEAVMPLMERVPELMKELTSGQRA<br>ATRMILETS DRFTVVQGYAGVGKTTQFRVMSAVNMLPESERPRV VGLGPHTRAVGEMRSQVD<br>AQT LASFLHDTQLQQRSGETPDFSNTLFLLD ESSMVGNTDMARAYALIAAGGGRAVASGDTDQLQ<br>AIAPGQPFRLQQTRSAADVAIMKEIVRQTPELREAVYSLINRDVERALSGLESVKPSQVPRQEGAW<br>APEHSVTEFSHSQEAKLAE AQKAMLKGEAFPDVPMTLYEAIVRDYTGRTPEAREQTLIVTHLNED<br>RRVLNSMIHDVREKAGELGKEQVMVPVLNTANIRDGELRRLSTWETHRDALVLVDNVYHRIAGIS<br>KDDGLITLQDAEGNTRLISP REVAEGVTL YTPDTIRVGTGDRMRFTKSDRERGYVANSVWTVTA<br>VSGDSVTLSDGQQTREIRPGQEQA EQHIDLAYAITAHGAQGASETFAIALEGTEGNRKL MAGFESA<br>YVALSRMKQHVVYTDNRQGWTDAINNAVQKGT AHDVFEPKPDREVMNAERLFSTARELRDVA<br>AGRAVLRQAGLAGGDS PARFIAPGRKYPQYVALPAFDRNGKSAGIWLNPLTTDDGNGLRGFSGE<br>GRVKGSGDAQFVALQGS RNGESLLADNMQDGVRIARDNPDSGVVVRIAGEGRPWNPGAITGGRV<br>WGDIPDNSVQPGAGNGEPVTA EVLAQRQAEEAIRRETERRADEIVRKM AENKPDLPDGKTEQAVR<br>EIAGQERDRAAITEREAALPEGV LREPQRVREAVREIARENLLQERLQQMERDMVRDLQKEKTLG<br>GD |
| TraY | 131  | 25% | BAA97943 | P06627 | MKRFGTRSATGKMVKLKL PVDVESLLIEASNRSGRSRSFEAVIRLKDHLHRYPKFN RAGNIYGKSL<br>VKYLTMRLDDETNQLLIAAKNRSGWCKTDEAADRVIDHLIKFPDFYNSEIFREADKEEDITFNTL                                                                                                                                                                                                                                                                                                                                                                                                                                                                                                                                                                                                                                                                                                                                                                                                                                                                                                                                                                                                                                                                                                                                                                                                                                                                                                                                                                                                                                                                                                                                                                                                                                                                                                                                                                                                            |
| TraM | 127  | 33% | BAA97941 | P10026 | MAKVNLYISNDAYEKINAIEKRRQEGAREKDV SFSATASMLLELGLRVHEAQMERKESAFNQTEF<br>NKLLLECVVKTQSSVAKILGIESLSPHVS GNSKFEYANMVEDIREKVSSEMERFFPKNDDE                                                                                                                                                                                                                                                                                                                                                                                                                                                                                                                                                                                                                                                                                                                                                                                                                                                                                                                                                                                                                                                                                                                                                                                                                                                                                                                                                                                                                                                                                                                                                                                                                                                                                                                                                                                                                 |

|      |     |     |          |        |                                                                                                                                                                                                                                                                                                                                                                                                                                                                                                                                                                                                                                                                                                                                                                                        |
|------|-----|-----|----------|--------|----------------------------------------------------------------------------------------------------------------------------------------------------------------------------------------------------------------------------------------------------------------------------------------------------------------------------------------------------------------------------------------------------------------------------------------------------------------------------------------------------------------------------------------------------------------------------------------------------------------------------------------------------------------------------------------------------------------------------------------------------------------------------------------|
| TraD | 717 | 29% | BAA97972 | P09130 | MSFNAKDMTQGGQIASMRIRMFsqIANIMLYCLFIFFWILVGLVLWIKISWQTFVNGCIYWWCTTL<br>EGMRDLIKSQPVYEIQYYGKTFRMNAAQVLHDKYMIWCSEQLWSAFVLAADVVALVICLITFFVVS<br>WILGRQGGKQqSENEVTGGRQLTDNPKDVARMLKKDGKDSDIRIGDLPiIRDSEIQNFCLHGTVGAG<br>KSEVIRRLANYARQGDMMVVIYDRSGEFVKSYYDPSIDKILNPLDARCAAWDLWKECLTQPDFDN<br>TANTLIPMGTKEDPFwQGSgRTIFAEAAYLmRNDPNRSYSKLVDTLLSIKIEKLRTYLRNSPAANLV<br>EEKIEKTAISIRAVLTNYVKAIrYLQqGIEHNGEpfTIRDWMRGVREDQKNGWLFISSNADTHASLKP<br>VISMWLSIAIRGLLAMGENRNRrvWFFCDELPTLHKLpDLVEILPEARkFGGCYVFGIQSYAQLEDI<br>YGEKAAASLFDVMNTRAFFRSPSHKIAEFAAGEIGEKEHLKASEQYSYGADPVRDGVSTGKDMER<br>QTLVSYSDIQSLPDLTCYVTLPGPYPAVKLSLKYQTRPKVAPEFIPRDINPEMENRLSAVLAAREAE<br>GRQMASLFEPDVPEVVSGEDVTQAEQPPQVSPAINDKKSDSGVNVpAGGIEQELKMKPEEEME<br>QLPPGISESgeVVDMAAYEAwQqENHPDIQQMQRRREEVnINVHrERGEDVEPGDDF |
| TraT | 244 | 34% | BAA97971 | P13979 | MMKTKKLMMVALVSSTLALSGCGAMSTAIKRNLEVKtQMSETIwLEPASERTVFLQIKNTSDKD<br>MSGLQGKIADAVKAKGYQVVtSPDKAYYwIQANVLKADKMDLRESQGWLNrgYEGAAVGAAL<br>GAGITGYNSNSAGATLGVGLAAGLVGMAADAMVEDVNYTMITDVQIAERTKATVTTDNVAALR<br>QGTSGAKIQTSTETGNQHkyQTRVVSnANKVNLKFEEAKPVLEDQLAKSIANIL                                                                                                                                                                                                                                                                                                                                                                                                                                                                                                                        |
| TraS | 173 | 8%  | BAA97970 | P09129 | MITQqIISSEVLKkKHIDSGDIRIPSLWQGLKPLIIMGWMIFCPLLMSFLITQKTSETLTAVLAGGW<br>LGLIILFIVARIRMLYFSLPEEFLKTSSVMRVISSKLKYFIVYMGVIFLWSFLGGGHIYFGGAILVTVI<br>MAFLIQLDIGRYQFVGVIDAINSYVKNKkLSRVK                                                                                                                                                                                                                                                                                                                                                                                                                                                                                                                                                                                                     |

\*Disordered sequences of transfer proteins were predicted using the Phyre2 algorithm [1], using the amino acid sequences of the transfer proteins in FASTA format as input via the Phyre2 web interface. Results were manually collated from Phyre2 outputs, and regions of predicted disorder are shaded in grey in the amino acid sequences above.

## References

1. Kelley, L.A.; Sternberg, M.J.E. Protein structure prediction on the Web: a case study using the Phyre server. *Nat. Protoc.* **2009**, *4*, 363–371, doi:10.1038/nprot.2009.2.
